# Supplementary material for: Diacylglycerol Kinase ζ Limits Cytokine-dependent Expansion of CD8+ T Cells with Broad Antitumor Capacity
Source: PubMed Central journal article supplement — eBioMedicine. 2017 Apr 14;19:39–48. doi: 10.1016/j.ebiom.2017.04.024 (PMC5440620; doi:10.1016/j.ebiom.2017.04.024), 2017-04-14
Supplement: mmc1.pdf [file mmc1.pdf]

## Supplemental Figures

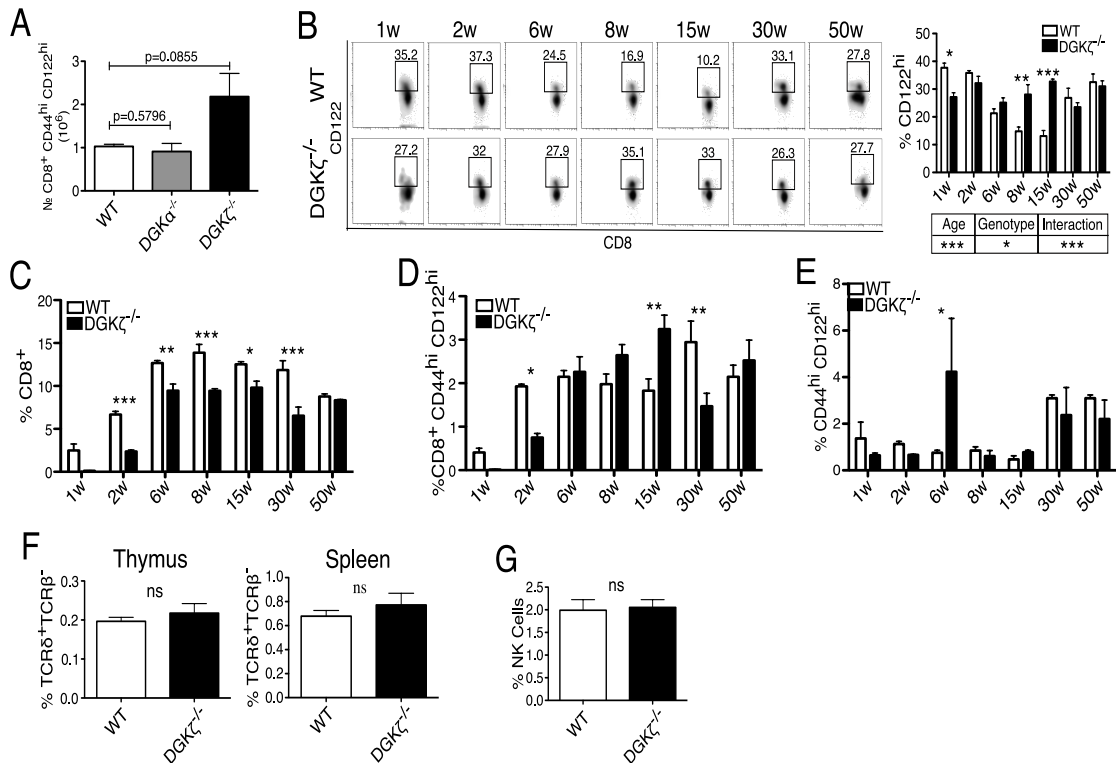

**Fig. S1. DGK $\zeta$ -deficient mice have altered CD8<sup>+</sup> and CD8<sup>+</sup>CD122<sup>+</sup> cell numbers**

**A.** Analysis of the total number of CD44<sup>hi</sup>CD122<sup>hi</sup> CD8<sup>+</sup> T cells in WT ( $n=6$ ), DGK $\alpha$ <sup>-</sup> ( $n=5$ ) and DGK $\zeta$ -deficient ( $n=6$ ) mouse spleens. Mean  $\pm$  SEM, unpaired Student's t-test with Welch's correction. **B.** Analysis of CD122<sup>hi</sup> CD8<sup>+</sup> T cells in spleens of WT and DGK $\zeta$ -deficient mice at different ages. Left, flow cytometry of CD8 and CD122 markers (gated on CD8<sup>+</sup> cells). Right, CD122<sup>hi</sup> percentages gated on CD8<sup>+</sup>. Mean  $\pm$  SEM, two-way ANOVA and Bonferroni post-test ( $n = 3$ /genotype and age, except DGK $\zeta$ <sup>-/-</sup> 50 weeks,  $n = 2$ ). **C.** Analysis of CD8<sup>+</sup> population in spleens of WT and DGK $\zeta$ -deficient mice at different ages. Mean  $\pm$  SEM, two-way ANOVA and Bonferroni post-test ( $n = 3$ /genotype and age, except DGK $\zeta$ <sup>-/-</sup> 50 weeks,  $n = 2$ ). **D.** Analysis of CD8<sup>+</sup>CD44<sup>hi</sup>CD122<sup>hi</sup> population in spleens of WT and DGK $\zeta$ -deficient mice at different ages. Mean  $\pm$  SEM, statistical analyses and groups as above. **E.** Analysis of the CD44<sup>hi</sup>CD122<sup>hi</sup> CD8 SP population in thymuses of WT and DGK $\zeta$ -deficient mice at different ages. Percentages of CD44<sup>hi</sup>CD122<sup>hi</sup> were analyzed in CD8<sup>+</sup>CD4<sup>-</sup> cells. Mean  $\pm$  SEM, Bonferroni post-test ( $n = 3$ /genotype and age, except DGK $\zeta$ <sup>-/-</sup> 50 weeks,  $n = 2$ ). **F.** Quantification of the  $\gamma\delta$  T cell population (TCR $\delta$ <sup>+</sup>TCR $\beta$ <sup>-</sup>) in thymus and spleen of WT and DGK $\zeta$ -deficient mice. Data were acquired in two independent experiments. Mean  $\pm$  SEM,  $n = 6$ /genotype. Unpaired t test. **G.** Analysis of NK cells (CD3<sup>+</sup>NKP46<sup>+</sup>) in spleens of WT and DGK $\zeta$ -deficient mice. Data were acquired in three independent experiments. Mean  $\pm$  SEM,  $n = 9$  per genotype. Unpaired t test.

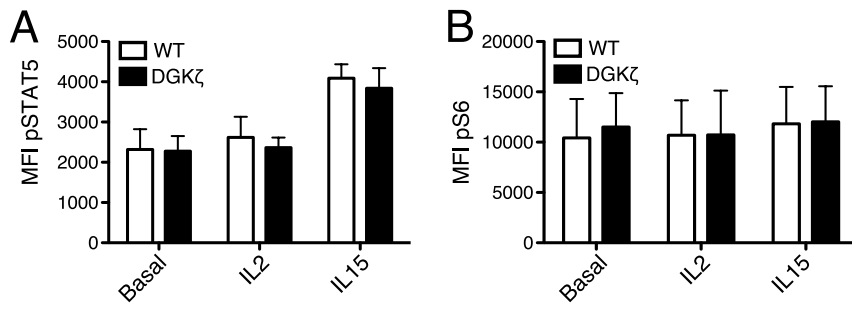

**Fig S2. DGK $\zeta$ -deficient CD8<sup>+</sup> CD44<sup>hi</sup> cells show similar STAT5 and S6 phosphorylation intensity than WT cells.** The geometric mean of pSTAT5 (A) or pS6 (B) was quantified in the CD8<sup>+</sup> CD44<sup>hi</sup> pSTAT<sup>+</sup>/pS6<sup>+</sup> population for the experiments described in figure 3. (Mean  $\pm$  SEM;  $n = 3$ /genotype, data were acquired in three independent experiments).

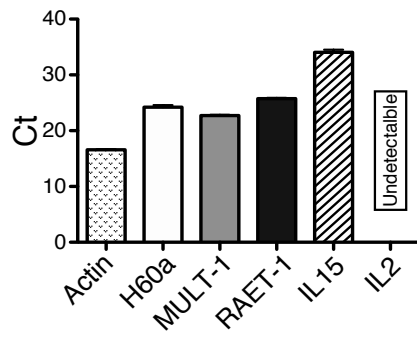

**Fig. S3. Analysis of mRNA levels for NKG2D ligands and cytokines in A20 cells**

mRNA levels of indicated molecules were analyzed by real-time qRT-PCR in A20 cells. Mean  $\pm$  SEM.
